# Supplementary material
Source: publisher figshare collection journal article supplement (https://frontiersin.figshare.com/ndownloader/files/27582950)
Supplement: Supplementary file [file 27582950]

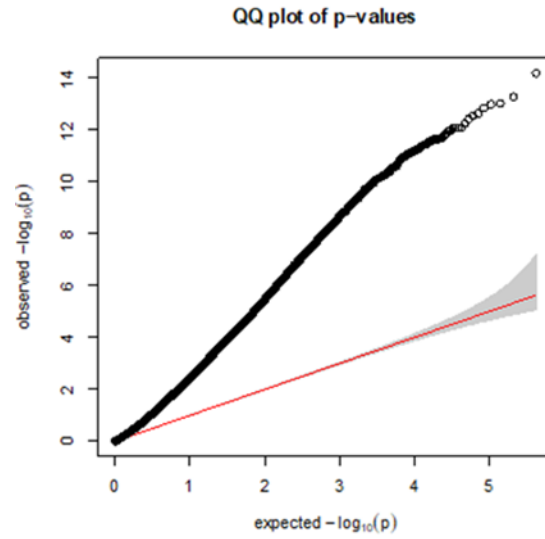

**Figure S5.** The quantile-quantile plot showing the log-transformed distributions of *limma* regression  $p$ -values associated with the DNAm differences in ASD cases compared to matching controls. The red line depicts a theoretical line according to the normal distribution.
